# Supplementary material for: Synthesis and characterization of flexible epoxy nanocomposites reinforced with amine functionalized aluminananoparticles: a potential encapsulant for organic devices
Source: Royal Society of Chemistry journal article supplement (doi:10.1039/c0py00270d), 2010-11-04
Supplement: c0py00270d.pdf [file c0py00270d.pdf]

Electronic Supplementary Information for the article **“Synthesis and characterization of flexible epoxy nanocomposites reinforced with amine functionalized alumina nanoparticles: A potential encapsulant for organic devices”** by Satyajit Gupta, Praveen C Ramamurthy\* and Giridhar Madras

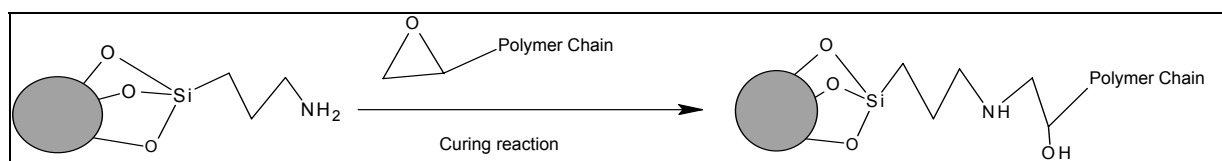

**Fig. S1** Schematic of curing reaction (strained epoxy ring opening by nucleophilic attack of amine) at the nanoparticles surface

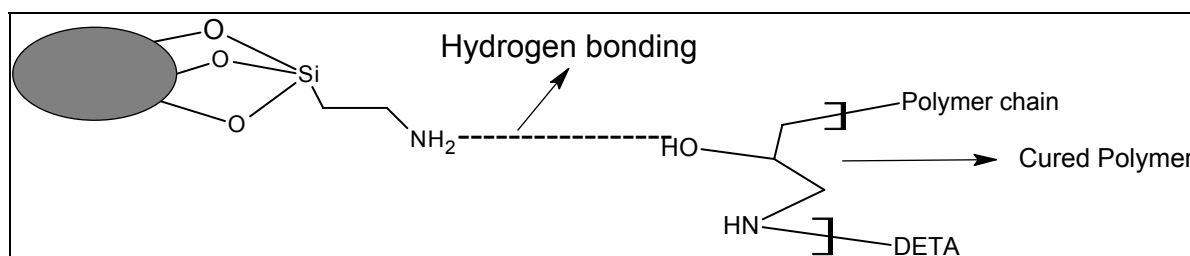

**Fig. S2** Schematic of interfacial H-bonding between free amine hydrogens at the surface and oxygen atom of the -OH group of the cured polymer.

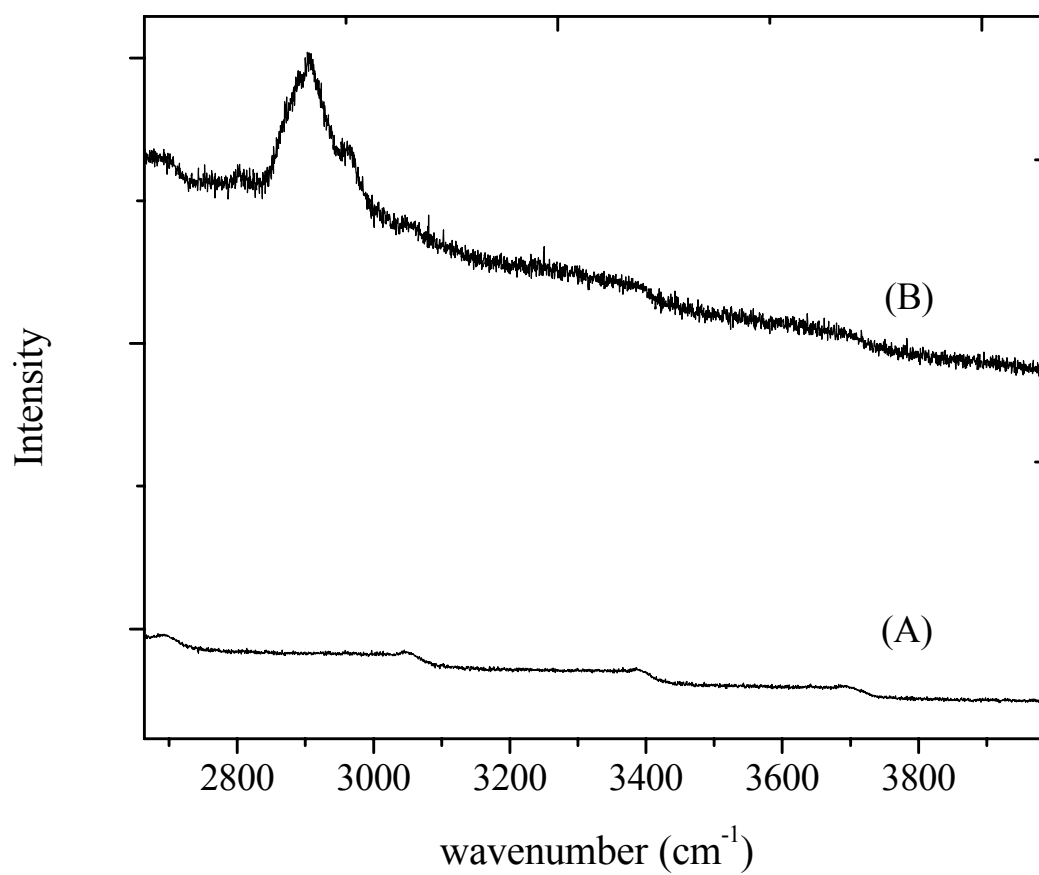

**Fig. S3** Raman spectra of neat alumina before (A) and after (B) functionalization.

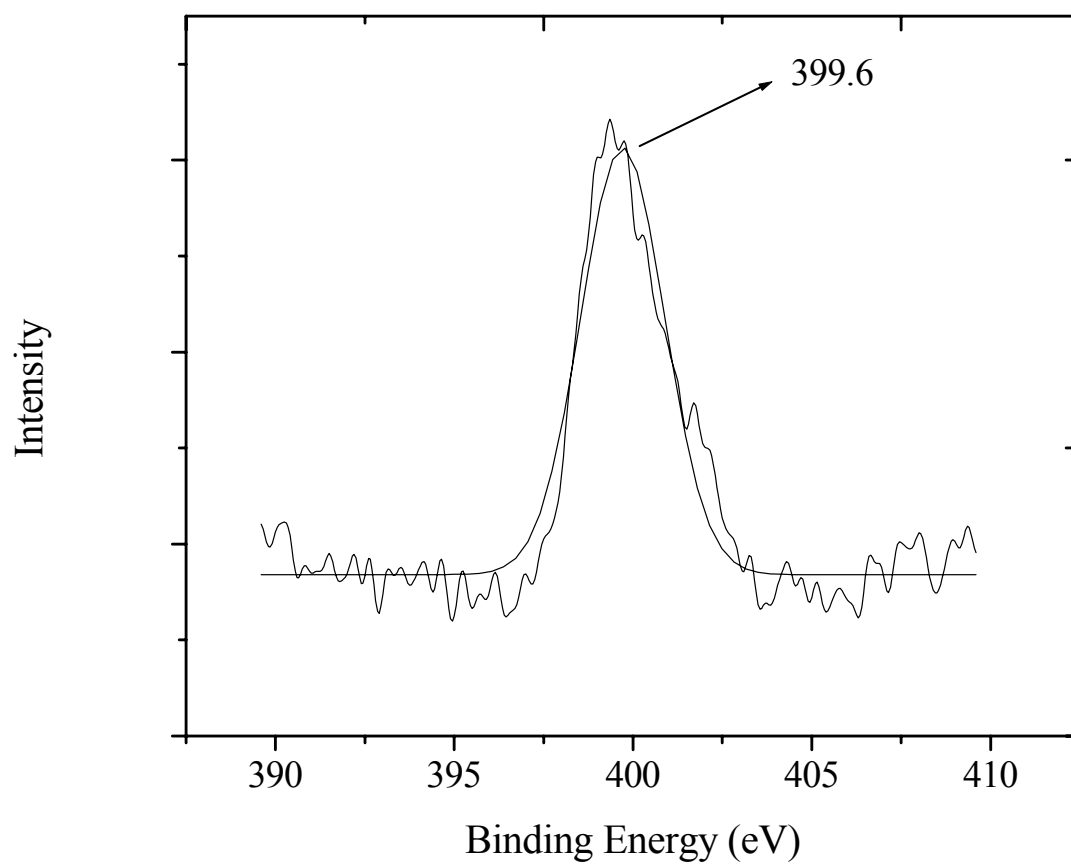

**Fig. S4** XPS spectra of Nitrogen (N1s)

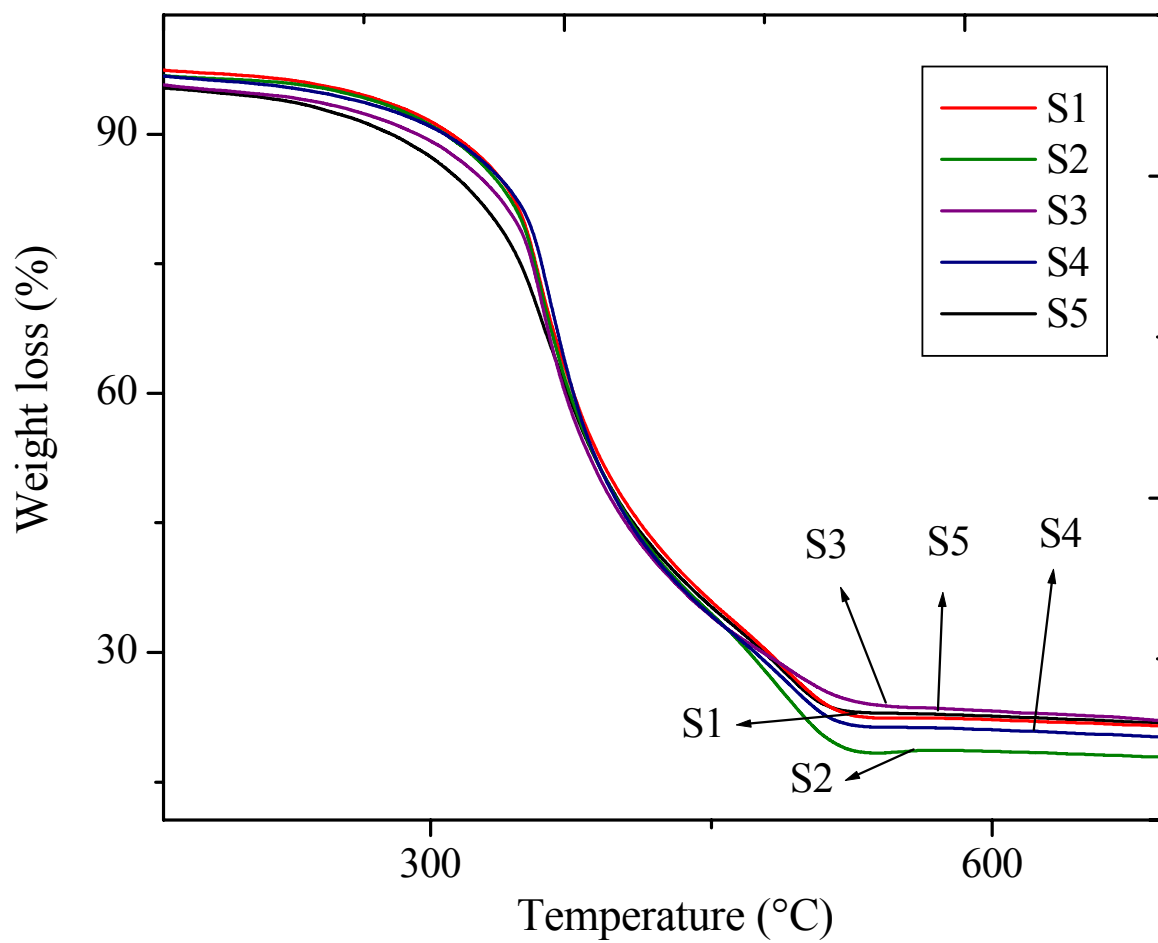

**Fig. S5** Thermogravimetric analysis of five different composites

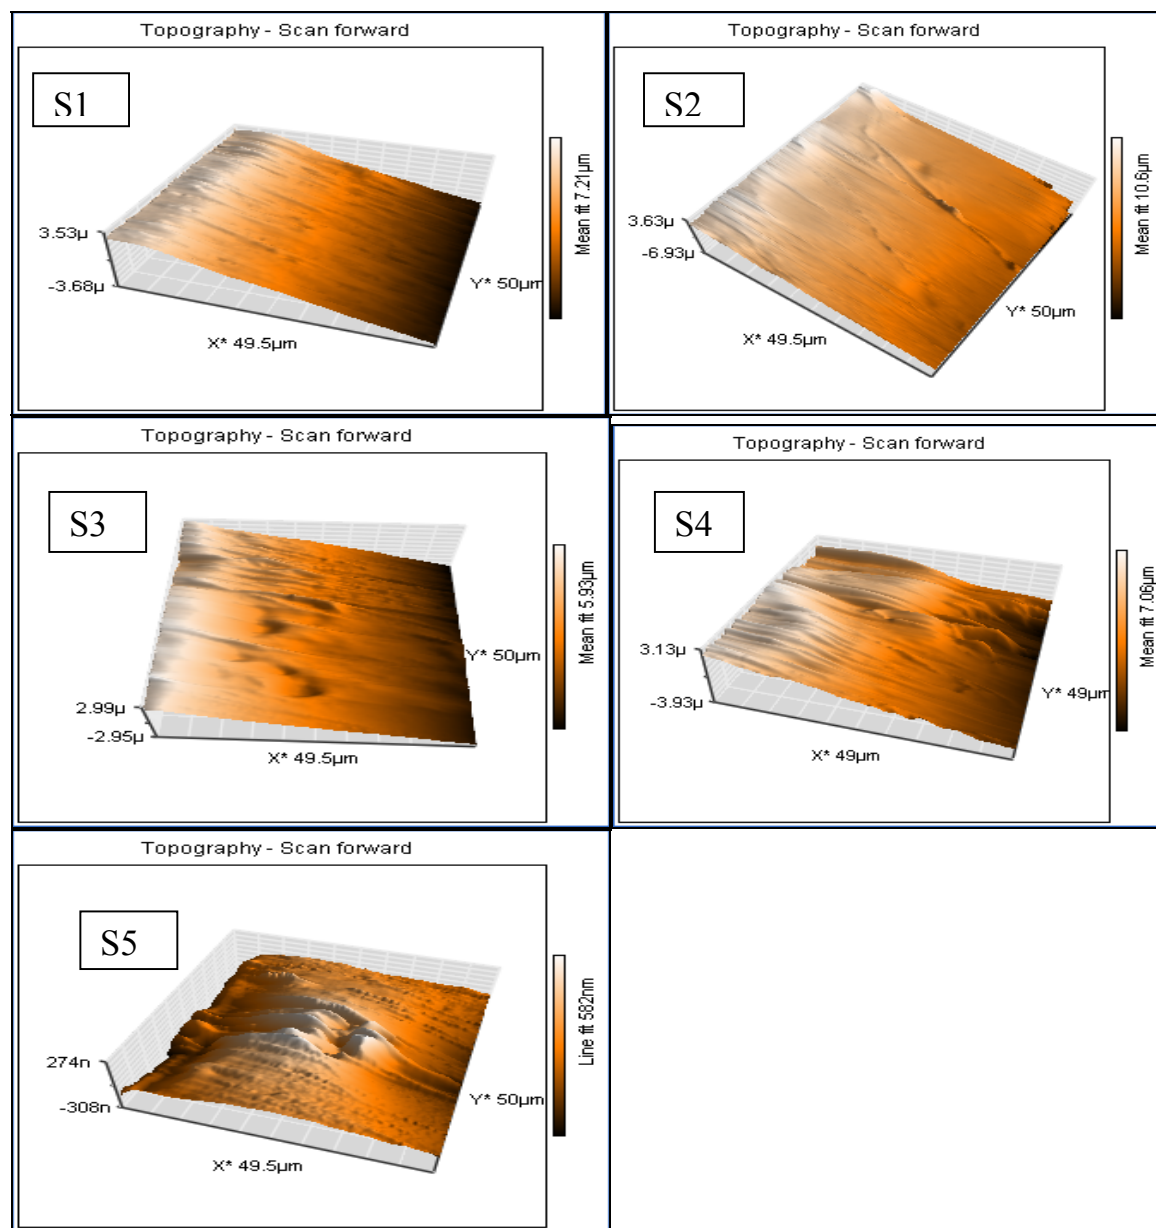

**Fig. S6** AFM images of different composites

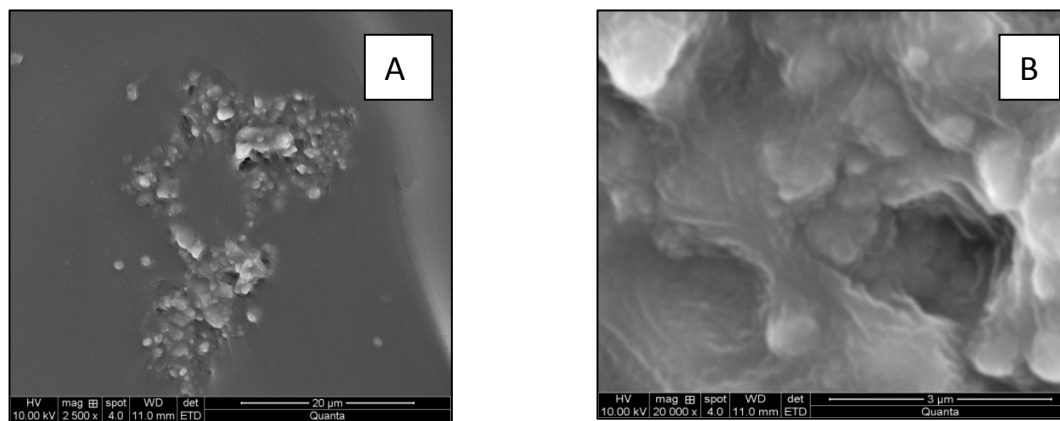

**Fig. S7** SEM images of S5 at 2,500X (A) and 20,000X (B)
